# Supplementary material
Source: PubMed Central journal article supplement (PMC7057179)
Supplement: jamadermatol-156-375-s001.pdf [file jamadermatol-156-375-s001.pdf]

## Supplementary Online Content

Andersson NW, Thomsen SF, Andersen JT. Evaluation of association between oral and topical terbinafine use in pregnancy and risk of major malformations and spontaneous abortion. *JAMA Dermatol*. Published online March 4, 2020.  
doi:10.1001/jamadermatol.2020.0142

**eMethods.** Definition of the Major Malformations

**eTable 1.** Definition of Covariates Included in Propensity Score With Definitions and Data Sources

**eTable 2.** Number of Missing Values (Percentages) for the Unmatched Study Cohorts

**eTable 3.** Baseline Characteristics of Unmatched Cohorts of Oral and Topical Terbinafine Exposed and Unexposed Pregnancies for Analyses of the Primary Outcome

**eTable 4.** Baseline Characteristics of Unmatched Cohorts of Oral and Topical Terbinafine Exposed and Unexposed Pregnancies for Analyses of the Secondary Outcome

**eTable 5.** Baseline Characteristics of Matched Cohorts of Oral and Topical Terbinafine Exposed and Unexposed Pregnancies on Propensity Scores for Analyses of the Secondary Outcome

**eTable 6.** Standardized Differences Comparison of Oral and Topical Terbinafine-Exposed and Unexposed Pregnancies Before Propensity Score Matching

**eTable 7.** Standardized Differences for Comparison of Oral and Topical Terbinafine-Exposed and Unexposed Pregnancies After Propensity Score Matching

**eTable 8.** Sensitivity Analyses for the Association Between Oral Terbinafine Use and Spontaneous Abortion as Compared With Unexposed Pregnancies Where Restricting According to Different Exposure Time Window Definitions

### eReferences

This supplementary material has been provided by the authors to give readers additional information about their work.

## **eMethods.**

### **Definition of the major malformations.**

Outcome cases of major malformations diagnosed within the first year of life were identified through the National Patient Registry.<sup>1</sup> Major malformations were defined according to the European Surveillance of Congenital Anomalies (EUROCAT) classification system of subgroups of major congenital anomalies, while excluding minor malformations according to EUROCAT exclusion list.<sup>2</sup> Major congenital malformations of known causes were excluded, including: genetic syndromes (ICD-10: Q447B, Q619A, Q751, Q754, Q771, Q772, Q780, Q796, Q85, Q87), malformation syndromes with known causes (ICD-10: Q86), and malformations due to chromosomal aberrations (ICD-10: Q90-99).

**eTable 1. Definition of covariates included in propensity score with definitions and data sources.**

| Variable                                                                        | Categories                                                                                                                      | Data source                              |
|---------------------------------------------------------------------------------|---------------------------------------------------------------------------------------------------------------------------------|------------------------------------------|
| Age at pregnancy onset                                                          | ≤19, 20-24, 25-29, 30-34, ≥35                                                                                                   | Central Person Registry                  |
| Married or living with partner                                                  | yes/no                                                                                                                          | Central Person Registry                  |
| Place of birth                                                                  | Denmark, Europe, Outside Europe                                                                                                 | Central Person Registry                  |
| Region of residence                                                             | The Capital Region of Denmark, Region Zealand, The Region of Southern Denmark, Central Denmark Region, The North Denmark Region | Central Person Registry                  |
| Gross household income                                                          | Quartiles                                                                                                                       | Statistic Denmark                        |
| Education level, years                                                          | ≤11, 12-13, 14-15, ≥16                                                                                                          | Statistic Denmark                        |
| Year of pregnancy onset                                                         | 1997-2000, 2001-2004, 2005-2008, 2009-2012, 2013-2016                                                                           | Medical Birth Registry                   |
| Parity <sup>a</sup>                                                             | 0, 1,2, ≥3                                                                                                                      | Medical Birth Registry                   |
| Multiple birth pregnancy <sup>a</sup>                                           | yes/no                                                                                                                          | Medical Birth Registry                   |
| Smoking during pregnancy <sup>a</sup>                                           | yes/no                                                                                                                          | Medical Birth Registry                   |
| Previous pregnancy with major malformation or spontaneous abortion <sup>b</sup> | yes/no                                                                                                                          | National Patient Registry                |
| Antidiabetic drug use in past year                                              | A10A, A10B                                                                                                                      | Registry of Medicinal Product Statistics |
| Drugs used for IVF in past 3 months                                             | G03G, G03DA04, H01CC, L02AE01                                                                                                   | Registry of Medicinal Product Statistics |
| No. of drugs used in past year                                                  | 0, 1-2, 3-4, ≥5                                                                                                                 | Registry of Medicinal Product Statistics |
| No. of days of hospitalization in past year                                     | 0, 1-2, ≥3                                                                                                                      | National Patient Registry                |
| No. of outpatient contacts in past year                                         | 0, 1-2, ≥3                                                                                                                      | National Patient Registry                |

ICD-10: international classification of disease, version 10; ATC: anatomic therapeutic chemical; IVF: in vitro fertilization. <sup>a</sup>Covariate was available for analyses on live births only. <sup>b</sup>Previous pregnancy with major malformations and spontaneous abortions variables were included in the analyses of major malformations and spontaneous abortion, respectively.

**eTable 2. Number of missing values (percentages) for the unmatched study cohorts.**

| <b>Variable</b>                                        | <b>For analysis of major malformations (n=1,030,873)</b> | <b>For analysis of spontaneous abortion (n=1,419,951)</b> |
|--------------------------------------------------------|----------------------------------------------------------|-----------------------------------------------------------|
| Age at pregnancy onset                                 | 0                                                        | 0                                                         |
| Married or living with partner                         | 13763 (1.3)                                              | 20618 (1.5)                                               |
| Place of birth                                         | 315 (0.0)                                                | 464 (0.0)                                                 |
| Region of residence                                    | 0                                                        | 50 (0.0)                                                  |
| Gross household income                                 | 676 (0.1)                                                | 1124 (0.1)                                                |
| Education level, years                                 | 42486 (4.1)                                              | 57966 (4.1)                                               |
| Year of pregnancy onset                                | 0                                                        | 0                                                         |
| Parity                                                 | 5640 (0.5)                                               | NA                                                        |
| Multiple birth pregnancy                               | 0                                                        | NA                                                        |
| Smoking during pregnancy                               | 23991 (2.3)                                              | NA                                                        |
| Previous pregnancy with the same adverse fetal outcome | 0                                                        | 0                                                         |
| Antidiabetic drug use in past year                     | 0                                                        | 0                                                         |
| Drugs used for IVF in past 3 months                    | 0                                                        | 0                                                         |
| No. of drugs used in past year                         | 0                                                        | 0                                                         |
| Hospital care utilization in past year                 | 0                                                        | 0                                                         |

NA: not available.

**eTable 3. Baseline characteristics of unmatched cohorts of oral and topical terbinafine exposed and unexposed pregnancies for analyses of the primary outcome. Values are numbers (percentages) unless otherwise stated.**

| Characteristics                                     | Unmatched cohort of oral and topical terbinafine exposed and unexposed pregnancies for analysis of major malformations |                                      |                         |
|-----------------------------------------------------|------------------------------------------------------------------------------------------------------------------------|--------------------------------------|-------------------------|
|                                                     | Oral terbinafine (n=522)                                                                                               | Topical terbinafine exposed (n=1476) | Unexposed (n=1,028,875) |
| Age at pregnancy onset                              |                                                                                                                        |                                      |                         |
| ≤19                                                 | 7 (1.3)                                                                                                                | 23 (1.6)                             | 14626 (1.4)             |
| 20-24                                               | 50 (9.6)                                                                                                               | 215 (14.6)                           | 114989 (11.2)           |
| 25-29                                               | 162 (31.0)                                                                                                             | 506 (34.3)                           | 338300 (32.9)           |
| 30-34                                               | 201 (38.5)                                                                                                             | 503 (34.1)                           | 367092 (35.7)           |
| ≥35                                                 | 102 (19.5)                                                                                                             | 229 (15.5)                           | 193868 (18.8)           |
| Married or living with partner                      | 445 (85.3)                                                                                                             | 1283 (86.9)                          | 902624 (87.7)           |
| Place of birth                                      |                                                                                                                        |                                      |                         |
| Denmark                                             | 423 (81.0)                                                                                                             | 1256 (85.1)                          | 868274 (84.4)           |
| Europe                                              | 32 (6.1)                                                                                                               | 76 (5.2)                             | 57870 (5.6)             |
| Outside of Europe                                   | 67 (12.8)                                                                                                              | 144 (9.8)                            | 102731 (10.0)           |
| Region of residence                                 |                                                                                                                        |                                      |                         |
| The Capital Region of Denmark                       | 149 (28.5)                                                                                                             | 432 (29.3)                           | 334580 (32.5)           |
| Region Zealand                                      | 58 (11.1)                                                                                                              | 205 (13.9)                           | 140563 (13.7)           |
| The Region of Southern Denmark                      | 109 (20.9)                                                                                                             | 293 (19.9)                           | 188987 (18.4)           |
| Central Denmark Region                              | 149 (28.5)                                                                                                             | 387 (26.2)                           | 260286 (25.3)           |
| The North Denmark Region                            | 57 (10.9)                                                                                                              | 159 (10.8)                           | 104459 (10.2)           |
| Gross household income, quartile                    |                                                                                                                        |                                      |                         |
| 1                                                   | 129 (24.7)                                                                                                             | 405 (27.4)                           | 257729 (25.1)           |
| 2                                                   | 124 (23.8)                                                                                                             | 448 (30.4)                           | 257057 (25.0)           |
| 3                                                   | 134 (25.7)                                                                                                             | 376 (25.5)                           | 257045 (25.0)           |
| 4                                                   | 135 (25.9)                                                                                                             | 247 (16.7)                           | 257044 (25.0)           |
| Education level, years                              |                                                                                                                        |                                      |                         |
| ≤11                                                 | 124 (23.8)                                                                                                             | 383 (26.0)                           | 226313 (22.0)           |
| 12-13                                               | 93 (17.8)                                                                                                              | 232 (15.7)                           | 151944 (14.8)           |
| 14-15                                               | 132 (25.3)                                                                                                             | 402 (27.2)                           | 262793 (25.5)           |
| ≥16                                                 | 173 (33.1)                                                                                                             | 459 (31.1)                           | 387825 (37.7)           |
| Year of pregnancy onset                             |                                                                                                                        |                                      |                         |
| 1997-2000                                           | 69 (13.2)                                                                                                              | 523 (35.4)                           | 221624 (21.5)           |
| 2001-2004                                           | 104 (19.9)                                                                                                             | 352 (23.9)                           | 220780 (21.5)           |
| 2005-2008                                           | 134 (25.7)                                                                                                             | 268 (18.2)                           | 220728 (21.5)           |
| 2009-2012                                           | 122 (23.4)                                                                                                             | 194 (13.1)                           | 202882 (19.7)           |
| 2013-2016                                           | 93 (17.8)                                                                                                              | 139 (9.4)                            | 162861 (15.8)           |
| Parity                                              |                                                                                                                        |                                      |                         |
| 1                                                   | 228 (43.7)                                                                                                             | 699 (47.4)                           | 466403 (45.3)           |
| 2                                                   | 177 (33.9)                                                                                                             | 529 (35.8)                           | 374786 (36.4)           |
| ≥3                                                  | 117 (22.4)                                                                                                             | 248 (16.8)                           | 187686 (18.2)           |
| Multiple birth pregnancy                            | 11 (2.1)                                                                                                               | 33 (2.2)                             | 42914 (4.2)             |
| Smoking during pregnancy                            | 82 (15.7)                                                                                                              | 272 (18.4)                           | 161613 (15.7)           |
| Previous pregnancy with major malformations outcome | 13 (2.5)                                                                                                               | 16 (1.1)                             | 18043 (1.8)             |
| Antidiabetic drug use in past year                  | 5 (1.0)                                                                                                                | 21 (1.4)                             | 12484 (1.2)             |
| Drugs used for IVF in past 3                        | 16 (3.1)                                                                                                               | 87 (5.9)                             | 63237 (6.2)             |

|                                         |            |            |               |
|-----------------------------------------|------------|------------|---------------|
| months                                  |            |            |               |
| No. of drugs used in past year          |            |            |               |
| 1-2                                     | 170 (32.6) | 487 (33.0) | 432845 (42.1) |
| 3-4                                     | 133 (25.5) | 400 (27.1) | 210313 (20.4) |
| ≥5                                      | 173 (33.1) | 381 (25.8) | 138522 (13.5) |
| No. of hospitalization in past year     |            |            |               |
| 1                                       | 74 (14.2)  | 226 (15.3) | 127810 (12.4) |
| 2                                       | 9 (1.7)    | 27 (1.8)   | 22795 (2.2)   |
| ≥3                                      | 5 (1.0)    | 15 (1.0)   | 7220 (0.7)    |
| No. of outpatient contacts in past year |            |            |               |
| 1                                       | 82 (15.7)  | 207 (14.0) | 141349 (13.7) |
| 2                                       | 27 (5.2)   | 84 (5.7)   | 51211 (5.0)   |
| ≥3                                      | 11 (2.1)   | 36 (2.4)   | 23885 (2.3)   |

IQR: Interquartile range. IVF: in vitro fertilization.

**eTable 4. Baseline characteristics of unmatched cohorts of oral and topical terbinafine exposed and unexposed pregnancies for analyses of the secondary outcome. Values are numbers (percentages) unless otherwise stated.**

| Characteristics                                               | Unmatched cohort of oral and topical terbinafine exposed and unexposed pregnancies for analysis of spontaneous abortion |                                      |                         |
|---------------------------------------------------------------|-------------------------------------------------------------------------------------------------------------------------|--------------------------------------|-------------------------|
|                                                               | Oral terbinafine (n=891)                                                                                                | Topical terbinafine exposed (n=3194) | Unexposed (n=1,415,866) |
| GA at first filled prescription for terbinafine, median (IQR) | 11 (-2-28)                                                                                                              | 66.5 (31-112)                        |                         |
| Age at pregnancy onset                                        |                                                                                                                         |                                      |                         |
| ≤19                                                           | 39 (4.4)                                                                                                                | 91 (2.9)                             | 55139 (3.9)             |
| 20-24                                                         | 110 (12.4)                                                                                                              | 481 (15.1)                           | 186237 (13.2)           |
| 25-29                                                         | 240 (26.9)                                                                                                              | 1064 (33.3)                          | 424531 (30.0)           |
| 30-34                                                         | 282 (31.7)                                                                                                              | 997 (31.2)                           | 457704 (32.3)           |
| ≥35                                                           | 220 (24.7)                                                                                                              | 561 (17.6)                           | 292255 (20.6)           |
| Married or living with partner                                | 696 (78.1)                                                                                                              | 2687 (84.1)                          | 1154141 (81.5)          |
| Place of birth                                                |                                                                                                                         |                                      |                         |
| Denmark                                                       | 734 (82.4)                                                                                                              | 2736 (85.7)                          | 1190579 (84.1)          |
| Europe                                                        | 50 (5.6)                                                                                                                | 167 (5.2)                            | 78791 (5.6)             |
| Outside of Europe                                             | 107 (12.0)                                                                                                              | 291 (9.1)                            | 146496 (10.4)           |
| Region of residence                                           |                                                                                                                         |                                      |                         |
| The Capital Region of Denmark                                 | 488 (54.8)                                                                                                              | 1234 (38.6)                          | 724948 (51.2)           |
| Region Zealand                                                | 64 (7.2)                                                                                                                | 376 (11.8)                           | 140141 (9.9)            |
| The Region of Southern Denmark                                | 113 (12.7)                                                                                                              | 506 (15.8)                           | 187992 (13.3)           |
| Central Denmark Region                                        | 166 (18.6)                                                                                                              | 769 (24.1)                           | 258906 (18.3)           |
| The North Denmark Region                                      | 60 (6.7)                                                                                                                | 309 (9.7)                            | 103879 (7.3)            |
| Gross household income, quartile                              |                                                                                                                         |                                      |                         |
| 1                                                             | 222 (24.9)                                                                                                              | 733 (23.0)                           | 354811 (25.1)           |
| 2                                                             | 214 (24.0)                                                                                                              | 953 (29.8)                           | 353694 (25.0)           |
| 3                                                             | 207 (23.2)                                                                                                              | 872 (27.3)                           | 253702 (25.0)           |
| 4                                                             | 248 (27.8)                                                                                                              | 636 (19.9)                           | 353659 (25.0)           |
| Education level, years                                        |                                                                                                                         |                                      |                         |
| ≤11                                                           | 266 (30.0)                                                                                                              | 899 (28.2)                           | 384341 (27.2)           |
| 12-13                                                         | 143 (16.1)                                                                                                              | 504 (15.8)                           | 211347 (14.9)           |
| 14-15                                                         | 204 (22.9)                                                                                                              | 845 (26.5)                           | 340875 (24.1)           |
| ≥16                                                           | 278 (31.2)                                                                                                              | 946 (29.6)                           | 479303 (33.9)           |
| Year of pregnancy onset                                       |                                                                                                                         |                                      |                         |
| 1997-2000                                                     | 134 (15.0)                                                                                                              | 1096 (34.3)                          | 308006 (21.8)           |
| 2001-2004                                                     | 165 (18.5)                                                                                                              | 766 (24.0)                           | 306139 (21.6)           |
| 2005-2008                                                     | 214 (24.0)                                                                                                              | 605 (18.9)                           | 303808 (21.5)           |
| 2009-2012                                                     | 213 (23.9)                                                                                                              | 408 (12.8)                           | 276027 (19.5)           |
| 2013-2016                                                     | 165 (18.5)                                                                                                              | 319 (10.0)                           | 221886 (15.7)           |
| Previous pregnancy with spontaneous abortion                  | 150 (16.8)                                                                                                              | 489 (15.3)                           | 216362 (15.3)           |
| Previous pregnancy with induced abortion                      | 153 (17.2)                                                                                                              | 317 (9.9)                            | 191454 (13.5)           |
| Antidiabetic drug use in past year                            | 10 (1.1)                                                                                                                | 57 (1.8)                             | 15620 (1.1)             |
| Drugs used for IVF in past 3 months                           | 25 (2.8)                                                                                                                | 169 (5.3)                            | 72965 (5.2)             |
| No. of drugs used in past year                                |                                                                                                                         |                                      |                         |

|                                         |            |             |               |
|-----------------------------------------|------------|-------------|---------------|
| 1-2                                     | 283 (31.8) | 1088 (34.1) | 591596 (41.8) |
| 3-4                                     | 230 (25.8) | 806 (25.2)  | 273830 (19.3) |
| ≥5                                      | 300 (33.7) | 824 (25.8)  | 173424 (12.3) |
| No. of hospitalization in past year     |            |             |               |
| 1                                       | 130 (14.6) | 465 (14.6)  | 180986 (12.8) |
| 2                                       | 22 (2.5)   | 72 (2.3)    | 33186 (2.3)   |
| ≥3                                      | 10 (1.1)   | 36 (1.1)    | 11274 (0.8)   |
| No. of outpatient contacts in past year |            |             |               |
| 1                                       | 146 (16.4) | 444 (13.9)  | 196011 (13.8) |
| 2                                       | 51 (5.7)   | 188 (5.9)   | 72098 (5.1)   |
| ≥3                                      | 23 (2.6)   | 77 (2.4)    | 33964 (2.4)   |

IQR: Interquartile range. IVF: in vitro fertilization.



**Table 5. Baseline characteristics of matched cohorts of oral and topical terbinafine exposed and unexposed pregnancies on propensity scores for analyses of the secondary outcome. Values are numbers (percentages) unless otherwise stated.**

| Characteristics                                               | Matched cohort of oral terbinafine exposed and unexposed pregnancies for analysis of spontaneous abortion |                    | Matched cohort of topical terbinafine exposed and unexposed pregnancies for analysis of spontaneous abortion |                     | Matched cohort of oral and topical terbinafine exposed pregnancies for analysis of spontaneous abortion |                                     |
|---------------------------------------------------------------|-----------------------------------------------------------------------------------------------------------|--------------------|--------------------------------------------------------------------------------------------------------------|---------------------|---------------------------------------------------------------------------------------------------------|-------------------------------------|
|                                                               | Oral terbinafine (n=891)                                                                                  | Unexposed (n=8910) | Topical terbinafine exposed (n=3174)                                                                         | Unexposed (n=31740) | Oral terbinafine (n=617)                                                                                | Topical terbinafine exposed (n=617) |
| GA at first filled prescription for terbinafine, median (IQR) | 11 (-2-28)                                                                                                |                    | 66 (31-111)                                                                                                  |                     | 20 (8-36)                                                                                               | 20 (7-37)                           |
| Age at pregnancy onset                                        |                                                                                                           |                    |                                                                                                              |                     |                                                                                                         |                                     |
| ≤19                                                           | 39 (4.4)                                                                                                  | 464 (5.2)          | 91 (2.9)                                                                                                     | 858 (2.7)           | 28 (4.5)                                                                                                | 26 (4.2)                            |
| 20-24                                                         | 110 (12.4)                                                                                                | 1113 (12.5)        | 479 (15.1)                                                                                                   | 4764 (15.0)         | 92 (14.9)                                                                                               | 92 (14.9)                           |
| 25-29                                                         | 240 (26.9)                                                                                                | 2217 (24.9)        | 1058 (33.3)                                                                                                  | 10826 (34.1)        | 159 (25.8)                                                                                              | 160 (25.9)                          |
| 30-34                                                         | 282 (31.7)                                                                                                | 2914 (32.7)        | 986 (31.1)                                                                                                   | 9999 (31.5)         | 200 (32.4)                                                                                              | 182 (29.5)                          |
| ≥35                                                           | 220 (24.7)                                                                                                | 2202 (24.7)        | 560 (17.6)                                                                                                   | 5293 (16.7)         | 138 (22.4)                                                                                              | 157 (25.5)                          |
| Married or living with partner                                | 696 (78.1)                                                                                                | 6943 (77.9)        | 2670 (84.1)                                                                                                  | 26900 (84.8)        | 480 (77.8)                                                                                              | 471 (76.3)                          |
| Place of birth                                                |                                                                                                           |                    |                                                                                                              |                     |                                                                                                         |                                     |
| Denmark                                                       | 734 (82.4)                                                                                                | 7367 (82.7)        | 2719 (85.7)                                                                                                  | 27441 (86.5)        | 511 (82.8)                                                                                              | 510 (82.7)                          |
| Europe                                                        | 50 (5.6)                                                                                                  | 484 (5.4)          | 167 (5.3)                                                                                                    | 1622 (5.1)          | 40 (6.5)                                                                                                | 39 (6.3)                            |
| Outside of Europe                                             | 107 (12.0)                                                                                                | 1059 (11.9)        | 288 (9.1)                                                                                                    | 2677 (8.4)          | 66 (10.7)                                                                                               | 68 (11.0)                           |
| Region of residence                                           |                                                                                                           |                    |                                                                                                              |                     |                                                                                                         |                                     |
| The Capital Region of Denmark                                 | 488 (54.8)                                                                                                | 4950 (55.6)        | 1224 (38.6)                                                                                                  | 11685 (36.8)        | 320 (51.9)                                                                                              | 329 (53.3)                          |
| Region Zealand                                                | 64 (7.2)                                                                                                  | 603 (6.8)          | 372 (11.7)                                                                                                   | 3915 (12.3)         | 52 (8.4)                                                                                                | 50 (8.1)                            |
| The Region of Southern Denmark                                | 113 (12.7)                                                                                                | 1152 (12.9)        | 505 (15.9)                                                                                                   | 5110 (16.1)         | 77 (12.5)                                                                                               | 69 (11.2)                           |
| Central Denmark Region                                        | 166 (18.6)                                                                                                | 1621 (18.2)        | 766 (24.1)                                                                                                   | 7858 (24.8)         | 118 (19.1)                                                                                              | 119 (19.3)                          |
| The North Denmark Region                                      | 60 (6.7)                                                                                                  | 584 (6.6)          | 307 (9.7)                                                                                                    | 3172 (10.0)         | 50 (8.1)                                                                                                | 50 (8.1)                            |
| Gross household income, quartile                              |                                                                                                           |                    |                                                                                                              |                     |                                                                                                         |                                     |
| 1                                                             | 222 (24.9)                                                                                                | 2158 (24.2)        | 730 (23.0)                                                                                                   | 7050 (22.2)         | 171 (27.7)                                                                                              | 183 (29.7)                          |
| 2                                                             | 214 (24.0)                                                                                                | 2093 (23.5)        | 945 (29.8)                                                                                                   | 9382 (29.6)         | 143 (23.2)                                                                                              | 144 (23.3)                          |
| 3                                                             | 207 (23.2)                                                                                                | 2088 (23.4)        | 865 (27.3)                                                                                                   | 8828 (27.8)         | 131 (21.2)                                                                                              | 119 (19.3)                          |
| 4                                                             | 248 (27.8)                                                                                                | 2571 (28.9)        | 634 (20.0)                                                                                                   | 6480 (20.4)         | 172 (27.9)                                                                                              | 171 (27.7)                          |
| Education level,                                              |                                                                                                           |                    |                                                                                                              |                     |                                                                                                         |                                     |

|                                              |            |             |             |              |            |            |
|----------------------------------------------|------------|-------------|-------------|--------------|------------|------------|
| years                                        |            |             |             |              |            |            |
| ≤11                                          | 266 (30.0) | 2710 (30.4) | 890 (28.0)  | 8822 (27.8)  | 194 (31.4) | 185 (30.0) |
| 12-13                                        | 143 (16.1) | 1364 (15.3) | 501 (15.8)  | 4933 (15.5)  | 93 (15.1)  | 98 (15.9)  |
| 14-15                                        | 204 (22.9) | 2016 (22.6) | 842 (26.5)  | 8511 (26.8)  | 153 (24.8) | 145 (23.5) |
| ≥16                                          | 278 (31.2) | 2820 (31.7) | 941 (29.7)  | 9474 (29.9)  | 177 (28.7) | 189 (30.6) |
| Year of pregnancy onset                      |            |             |             |              |            |            |
| 1997-2000                                    | 134 (15.0) | 1429 (16.0) | 1093 (34.4) | 11072 (34.9) | 122 (19.8) | 128 (20.8) |
| 2001-2004                                    | 165 (18.5) | 1605 (18.0) | 757 (23.9)  | 7530 (23.7)  | 126 (20.4) | 132 (21.4) |
| 2005-2008                                    | 214 (24.0) | 2180 (24.5) | 602 (19.0)  | 5952 (18.8)  | 142 (23.0) | 143 (23.2) |
| 2009-2012                                    | 213 (23.9) | 2121 (23.8) | 406 (12.8)  | 4067 (12.8)  | 125 (20.3) | 118 (19.1) |
| 2013-2016                                    | 165 (18.5) | 1575 (17.7) | 316 (10.0)  | 3119 (9.8)   | 102 (16.5) | 96 (15.6)  |
| Previous pregnancy with spontaneous abortion | 150 (16.8) | 1252 (14.1) | 486 (15.3)  | 4383 (13.8)  | 83 (13.5)  | 82 (13.3)  |
| Previous pregnancy with induced abortion     | 153 (17.2) | 1474 (16.5) | 316 (10.0)  | 2756 (8.7)   | 103 (16.7) | 98 (15.9)  |
| Antidiabetic drug use in past year           | 10 (1.1)   | 108 (1.2)   | 55 (1.7)    | 454 (1.4)    | 7 (1.1)    | 5 (0.8)    |
| Drugs used for IVF in past 3 months          | 25 (2.8)   | 293 (3.3)   | 168 (5.3)   | 1576 (5.0)   | 19 (3.1)   | 21 (3.4)   |
| No. of drugs used in past year               |            |             |             |              |            |            |
| 1-2                                          | 283 (31.8) | 2781 (31.2) | 1079 (34.0) | 10854 (34.2) | 188 (30.5) | 181 (29.3) |
| 3-4                                          | 230 (25.8) | 2307 (25.9) | 801 (25.2)  | 8385 (26.4)  | 153 (24.8) | 159 (25.8) |
| ≥5                                           | 300 (33.7) | 3027 (34.0) | 819 (25.8)  | 7733 (24.4)  | 216 (35.0) | 216 (35.0) |
| No. of hospitalization in past year          |            |             |             |              |            |            |
| 1                                            | 130 (14.6) | 1272 (14.3) | 461 (14.5)  | 4259 (13.4)  | 95 (15.4)  | 92 (14.9)  |
| 2                                            | 22 (2.5)   | 171 (1.9)   | 71 (2.2)    | 541 (1.7)    | 13 (2.1)   | 8 (1.3)    |
| ≥3                                           | 10 (1.1)   | 87 (1.0)    | 36 (1.1)    | 212 (0.7)    | 8 (1.3)    | 12 (1.9)   |
| No. of outpatient contacts in past year      |            |             |             |              |            |            |
| 1                                            | 146 (16.4) | 1475 (16.6) | 441 (13.9)  | 4213 (13.3)  | 92 (14.9)  | 92 (14.9)  |
| 2                                            | 51 (5.7)   | 468 (5.3)   | 187 (5.9)   | 1460 (4.6)   | 30 (4.9)   | 32 (5.2)   |
| ≥3                                           | 23 (2.6)   | 167 (1.9)   | 77 (2.4)    | 567 (1.8)    | 17 (2.8)   | 16 (2.6)   |

IQR: Interquartile range. IVF: in vitro fertilization.

**eTable 6. Standardized differences comparison of oral and topical terbinafine exposed and unexposed pregnancies before propensity score matching. Values are percentages (%).**

| Characteristics                  | Unmatched cohorts for analyses of major malformations |                                   |                              | Unmatched cohorts for analyses of spontaneous abortion |                                   |                              |
|----------------------------------|-------------------------------------------------------|-----------------------------------|------------------------------|--------------------------------------------------------|-----------------------------------|------------------------------|
|                                  | Oral terbinafine vs. unexposed                        | Topical terbinafine vs. unexposed | Oral vs. topical terbinafine | Oral terbinafine vs. unexposed                         | Topical terbinafine vs. unexposed | Oral vs. topical terbinafine |
| Age at pregnancy onset           |                                                       |                                   |                              |                                                        |                                   |                              |
| ≤19                              | 0.7                                                   | 1.1                               | 1.7                          | 2.4                                                    | 5.8                               | 8.2                          |
| 20-24                            | 5.2                                                   | 10.1                              | 15.0                         | 2.4                                                    | 5.5                               | 8.0                          |
| 25-29                            | 4.0                                                   | 3.0                               | 6.8                          | 6.8                                                    | 7.2                               | 13.9                         |
| 30-34                            | 5.9                                                   | 3.4                               | 8.8                          | 1.5                                                    | 2.4                               | 1.0                          |
| ≥35                              | 1.8                                                   | 8.8                               | 10.6                         | 9.7                                                    | 7.8                               | 17.6                         |
| Married or living with partner   | 7.3                                                   | 2.4                               | 4.8                          | 8.5                                                    | 6.9                               | 15.4                         |
| Place of birth                   |                                                       |                                   |                              |                                                        |                                   |                              |
| Denmark                          | 8.9                                                   | 2.0                               | 10.7                         | 5.6                                                    | 4.4                               | 8.9                          |
| Europe                           | 2.2                                                   | 2.1                               | 4.5                          | 0.2                                                    | 1.5                               | 1.7                          |
| Outside of Europe                | 9.0                                                   | 0.8                               | 9.4                          | 5.3                                                    | 4.2                               | 9.4                          |
| Region of residence              |                                                       |                                   |                              |                                                        |                                   |                              |
| The Capital Region of Denmark    | 8.6                                                   | 7.0                               | 1.9                          | 7.2                                                    | 25.5                              | 32.7                         |
| Region Zealand                   | 7.8                                                   | 0.7                               | 8.2                          | 9.7                                                    | 6.0                               | 15.7                         |
| The Region of Southern Denmark   | 6.3                                                   | 3.8                               | 3.0                          | 1.8                                                    | 7.3                               | 9.0                          |
| Central Denmark Region           | 7.3                                                   | 2.1                               | 5.3                          | 0.9                                                    | 14.2                              | 13.3                         |
| The North Denmark Region         | 2.5                                                   | 2.0                               | 0.1                          | 2.4                                                    | 8.4                               | 10.7                         |
| Gross household income, quartile |                                                       |                                   |                              |                                                        |                                   |                              |
| 1                                | 0.8                                                   | 5.4                               | 5.1                          | 0.3                                                    | 5.0                               | 4.9                          |
| 2                                | 2.9                                                   | 12.0                              | 10.6                         | 2.2                                                    | 10.9                              | 11.4                         |
| 3                                | 1.6                                                   | 1.1                               | 8.8                          | 4.1                                                    | 5.3                               | 14.6                         |
| 4                                | 2.0                                                   | 20.4                              | 23.6                         | 6.5                                                    | 12.2                              | 19.9                         |
| Education level, years           |                                                       |                                   |                              |                                                        |                                   |                              |
| ≤11                              | 4.2                                                   | 9.3                               | 5.1                          | 6.0                                                    | 2.2                               | 3.6                          |
| 12-13                            | 8.3                                                   | 2.6                               | 5.7                          | 3.1                                                    | 2.4                               | 0.8                          |
| 14-15                            | 0.6                                                   | 3.8                               | 4.0                          | 2.8                                                    | 5.5                               | 8.2                          |
| ≥16                              | 9.5                                                   | 13.9                              | 4.0                          | 5.7                                                    | 9.1                               | 3.5                          |
| Year of pregnancy onset          |                                                       |                                   |                              |                                                        |                                   |                              |
| 1997-2000                        | 22.1                                                  | 31.2                              | 53.3                         | 17.4                                                   | 28.2                              | 45.9                         |
| 2001-2004                        | 3.8                                                   | 5.7                               | 10.1                         | 7.8                                                    | 5.6                               | 13.3                         |
| 2005-2008                        | 10.0                                                  | 8.3                               | 18.5                         | 6.1                                                    | 6.3                               | 12.4                         |

|                                          |      |      |      |      |      |      |
|------------------------------------------|------|------|------|------|------|------|
| 2009-2012                                | 8.9  | 17.8 | 26.7 | 10.7 | 18.4 | 29.0 |
| 2013-2016                                | 5.3  | 19.4 | 24.8 | 7.6  | 17.1 | 24.6 |
| Parity                                   |      |      |      |      |      |      |
| 1                                        | 3.3  | 4.1  | 7.3  | NA   | NA   | NA   |
| 2                                        | 5.3  | 1.2  | 4.2  | NA   | NA   | NA   |
| ≥3                                       | 10.4 | 3.8  | 14.2 | NA   | NA   | NA   |
| Multiple birth pregnancy                 | 11.9 | 11.0 | 2.5  | NA   | NA   | NA   |
| Smoking during pregnancy                 | 0.0  | 7.2  | 7.0  | NA   | NA   | NA   |
| Previous pregnancy with the same outcome | 5.1  | 5.7  | 10.7 | 1.9  | 0.1  | 2.1  |
| Previous pregnancy with induced abortion | NE   | NE   | NE   | 10.1 | 11.2 | 21.2 |
| Antidiabetic drug use in past year       | 2.5  | 1.8  | 4.2  | 0.2  | 5.7  | 5.5  |
| Drugs used for IVF in past 3 months      | 14.7 | 1.1  | 13.5 | 12.0 | 0.6  | 12.6 |
| No. of drugs used in past year           |      |      |      |      |      |      |
| 1-2                                      | 19.7 | 18.8 | 0.7  | 20.9 | 16.0 | 6.5  |
| 3-4                                      | 12.0 | 15.7 | 0.8  | 15.5 | 14.2 | 0.2  |
| ≥5                                       | 47.9 | 31.5 | 11.3 | 52.7 | 35.1 | 15.6 |
| No. of hospitalization in past year      |      |      |      |      |      |      |
| 1                                        | 5.2  | 8.4  | 3.0  | 5.3  | 5.2  | 0.1  |
| 2                                        | 3.5  | 2.7  | 1.7  | 0.8  | 0.6  | 1.4  |
| ≥3                                       | 2.8  | 3.4  | 0.5  | 3.4  | 3.4  | 0.0  |
| No. of outpatient contacts in past year  |      |      |      |      |      |      |
| 1                                        | 5.6  | 0.8  | 5.1  | 7.1  | 0.2  | 6.8  |
| 2                                        | 0.9  | 3.2  | 2.6  | 2.8  | 3.5  | 0.7  |
| ≥3                                       | 1.5  | 0.8  | 2.1  | 1.2  | 0.1  | 1.1  |

IQR: Interquartile range. IVF: in vitro fertilization. NA: not available. NE: not estimated.

**eTable 7. Standardized differences for comparison of oral and topical terbinafine exposed and unexposed pregnancies after propensity score matching. Values are percentages (%).**

| Characteristics                  | Matched cohorts for analyses of major malformations |                                   |                              | Matched cohorts for analyses of spontaneous abortion |                                   |                              |
|----------------------------------|-----------------------------------------------------|-----------------------------------|------------------------------|------------------------------------------------------|-----------------------------------|------------------------------|
|                                  | Oral terbinafine vs. unexposed                      | Topical terbinafine vs. unexposed | Oral vs. topical terbinafine | Oral terbinafine vs. unexposed                       | Topical terbinafine vs. unexposed | Oral vs. topical terbinafine |
| Age at pregnancy onset           |                                                     |                                   |                              |                                                      |                                   |                              |
| ≤19                              | 5.1                                                 | 2.3                               | 3.6                          | 3.9                                                  | 1.0                               | 1.6                          |
| 20-24                            | 0.2                                                 | 0.7                               | 2.6                          | 0.4                                                  | 0.2                               | 0.0                          |
| 25-29                            | 1.2                                                 | 1.2                               | 1.3                          | 4.7                                                  | 1.6                               | 0.4                          |
| 30-34                            | 3.3                                                 | 1.1                               | 0.4                          | 2.3                                                  | 0.9                               | 6.3                          |
| ≥35                              | 4.2                                                 | 4.6                               | 3.0                          | 0.1                                                  | 2.6                               | 7.2                          |
| Married or living with partner   | 1.7                                                 | 1.8                               | 2.8                          | 0.5                                                  | 1.7                               | 3.5                          |
| Place of birth                   |                                                     |                                   |                              |                                                      |                                   |                              |
| Denmark                          | 2.7                                                 | 4.0                               | 3.6                          | 0.8                                                  | 2.3                               | 0.4                          |
| Europe                           | 6.3                                                 | 1.8                               | 1.7                          | 0.8                                                  | 0.7                               | 0.7                          |
| Outside of Europe                | 1.1                                                 | 3.5                               | 3.1                          | 0.4                                                  | 2.3                               | 1.0                          |
| Region of residence              |                                                     |                                   |                              |                                                      |                                   |                              |
| The Capital Region of Denmark    | 2.3                                                 | 0.3                               | 2.6                          | 1.6                                                  | 3.6                               | 2.9                          |
| Region Zealand                   | 1.0                                                 | 0.8                               | 2.5                          | 1.6                                                  | 1.9                               | 1.2                          |
| The Region of Southern Denmark   | 0.6                                                 | 0.5                               | 1.9                          | 0.7                                                  | 0.5                               | 4.0                          |
| Central Denmark Region           | 0.1                                                 | 0.3                               | 0.4                          | 1.1                                                  | 1.5                               | 0.4                          |
| The North Denmark Region         | 3.0                                                 | 0.2                               | 0.6                          | 0.7                                                  | 1.1                               | 0.0                          |
| Gross household income, quartile |                                                     |                                   |                              |                                                      |                                   |                              |
| 1                                | 2.4                                                 | 0.5                               | 6.8                          | 1.6                                                  | 1.9                               | 4.3                          |
| 2                                | 2.9                                                 | 1.9                               | 2.9                          | 1.2                                                  | 0.5                               | 0.4                          |
| 3                                | 2.7                                                 | 1.2                               | 3.8                          | 0.5                                                  | 1.3                               | 4.8                          |
| 4                                | 2.5                                                 | 0.4                               | 0.4                          | 2.3                                                  | 1.1                               | 0.4                          |
| Education level, years           |                                                     |                                   |                              |                                                      |                                   |                              |
| ≤11                              | 1.2                                                 | 1.7                               | 3.2                          | 1.2                                                  | 0.6                               | 3.2                          |
| 12-13                            | 1.3                                                 | 1.3                               | 1.0                          | 2.0                                                  | 0.7                               | 2.2                          |
| 14-15                            | 1.3                                                 | 0.2                               | 0.0                          | 0.6                                                  | 0.7                               | 3.0                          |
| ≥16                              | 0.9                                                 | 0.4                               | 2.1                          | 1.0                                                  | 0.4                               | 4.3                          |
| Year of pregnancy onset          |                                                     |                                   |                              |                                                      |                                   |                              |
| 1997-2000                        | 1.9                                                 | 1.3                               | 1.7                          | 2.8                                                  | 0.9                               | 2.4                          |
| 2001-2004                        | 0.5                                                 | 0.3                               | 2.5                          | 1.3                                                  | 0.3                               | 2.4                          |
| 2005-2008                        | 3.7                                                 | 1.1                               | 3.6                          | 1.1                                                  | 0.6                               | 0.4                          |
| 2009-2012                        | 0.3                                                 | 0.7                               | 2.8                          | 0.2                                                  | 0.1                               | 2.9                          |
| 2013-2016                        | 7.1                                                 | 1.1                               | 0.0                          | 2.2                                                  | 0.4                               | 2.7                          |

|                                          |     |     |     |     |     |     |
|------------------------------------------|-----|-----|-----|-----|-----|-----|
| Parity                                   |     |     |     |     |     |     |
| 1                                        | 2.4 | 2.1 | 0.0 | NA  | NA  | NA  |
| 2                                        | 4.0 | 0.0 | 2.9 | NA  | NA  | NA  |
| ≥3                                       | 1.7 | 2.8 | 3.4 | NA  | NA  | NA  |
| Multiple birth pregnancy                 | 1.7 | 1.2 | 1.3 | NA  | NA  | NA  |
| Smoking during pregnancy                 | 0.4 | 1.9 | 1.6 | NA  | NA  | NA  |
| Previous pregnancy with the same outcome | 1.1 | 1.1 | 0.0 | 1.5 | 4.3 | 0.5 |
| Previous pregnancy with induced abortion | NE  | NE  | NE  | 1.7 | 4.4 | 2.2 |
| Antidiabetic drug use in past year       | 4.6 | 3.0 | 1.9 | 0.8 | 2.4 | 3.3 |
| Drugs used for IVF in past 3 months      | 1.7 | 2.6 | 1.1 | 2.8 | 1.5 | 1.8 |
| No. of drugs used in past year           |     |     |     |     |     |     |
| 1-2                                      | 1.4 | 0.1 | 4.6 | 1.2 | 0.4 | 2.5 |
| 3-4                                      | 3.6 | 2.5 | 0.4 | 0.2 | 2.7 | 2.2 |
| ≥5                                       | 2.0 | 2.5 | 0.8 | 0.6 | 3.3 | 0.0 |
| No. of hospitalization in past year      |     |     |     |     |     |     |
| 1                                        | 6.0 | 4.1 | 5.2 | 0.9 | 3.2 | 1.4 |
| 2                                        | 0.7 | 3.9 | 2.8 | 3.8 | 3.8 | 6.3 |
| ≥3                                       | 3.2 | 1.5 | 0.0 | 1.4 | 4.9 | 5.1 |
| No. of outpatient contacts in past year  |     |     |     |     |     |     |
| 1                                        | 6.3 | 0.6 | 3.3 | 0.5 | 1.8 | 0.0 |
| 2                                        | 1.1 | 4.9 | 5.6 | 2.1 | 5.8 | 1.5 |
| ≥3                                       | 1.9 | 3.5 | 1.3 | 4.8 | 4.5 | 1.0 |

IQR: Interquartile range. IVF: in vitro fertilization. NA: not available. NE: not estimated.

**eTable 8. Sensitivity analyses for the association between oral terbinafine use and spontaneous abortion as compared with unexposed pregnancies where restricting according to different exposure time window definitions.**

| <b>Oral terbinafine exposed vs. unexposed for analysis of spontaneous abortion</b> | <b>No. with spontaneous abortion/total no. (%)</b> | <b>Hazard Ratio (95% CI)</b> |
|------------------------------------------------------------------------------------|----------------------------------------------------|------------------------------|
| Oral terbinafine prescription filled later than gestational week 5                 |                                                    |                              |
| Oral terbinafine                                                                   | 14/165 (8.5%)                                      | 1.13 (0.65-1.95)             |
| Unexposed                                                                          | 140/1650 (8.5%)                                    | 1.00 (reference)             |
| Oral terbinafine exposure interval restricted to day 0-154                         |                                                    |                              |
| Oral terbinafine                                                                   | 64/637 (10.1%)                                     | 1.05 (0.81-1.36)             |
| Unexposed                                                                          | 643/6370 (10.1%)                                   | 1.00 (reference)             |

CI: Confidence interval

## eReferences

1. Lyng E, Sandegaard JL, Rebolj M. The Danish National Patient Register. *Scand J Public Health*. 2011;39(7\_suppl):30-33. doi:10.1177/1403494811401482
2. EUROCAT Guide 1.4. Instructions for the registration and surveillance of congenital anomalies. Available at: [https://eu-rd-platform.jrc.ec.europa.eu/sites/default/files/Full\\_Guide\\_1\\_4\\_version\\_28\\_DEC2018.pdf](https://eu-rd-platform.jrc.ec.europa.eu/sites/default/files/Full_Guide_1_4_version_28_DEC2018.pdf). Retrieved May 16, 2019.
